# Supplementary material
Source: ML conference proceedings conference paper supplement (https://openreview.net/forum?id=QudbVyFaTu)

Support Recovery

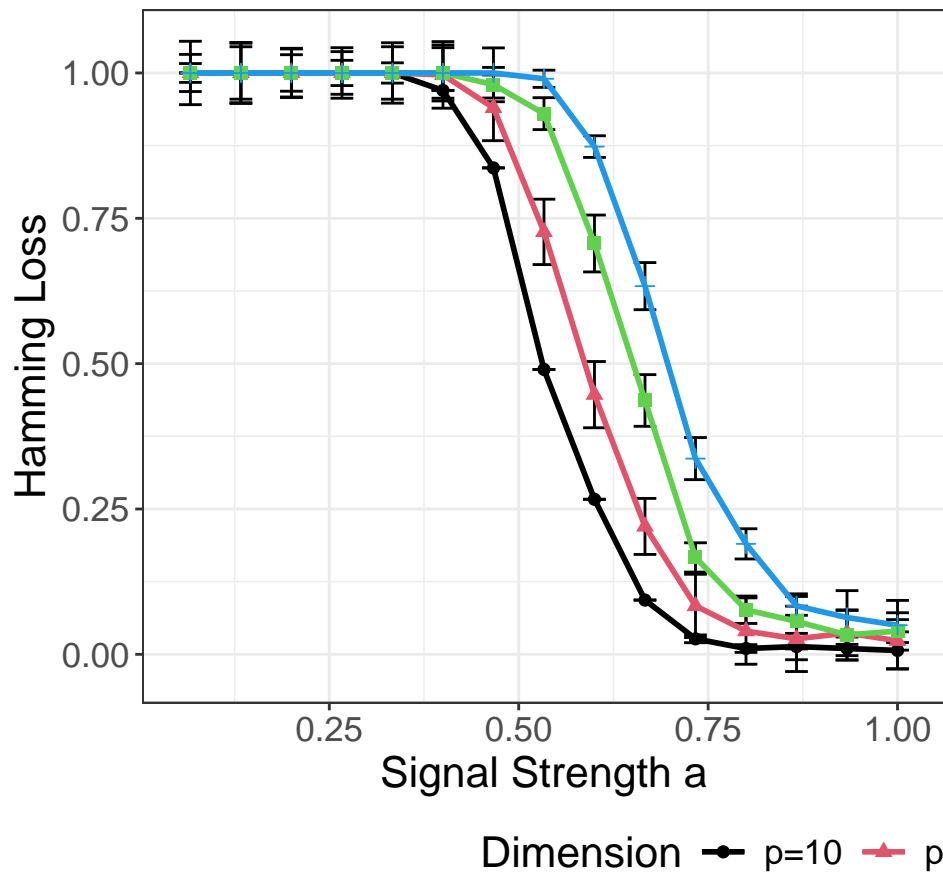

Sparse Multiple Testing

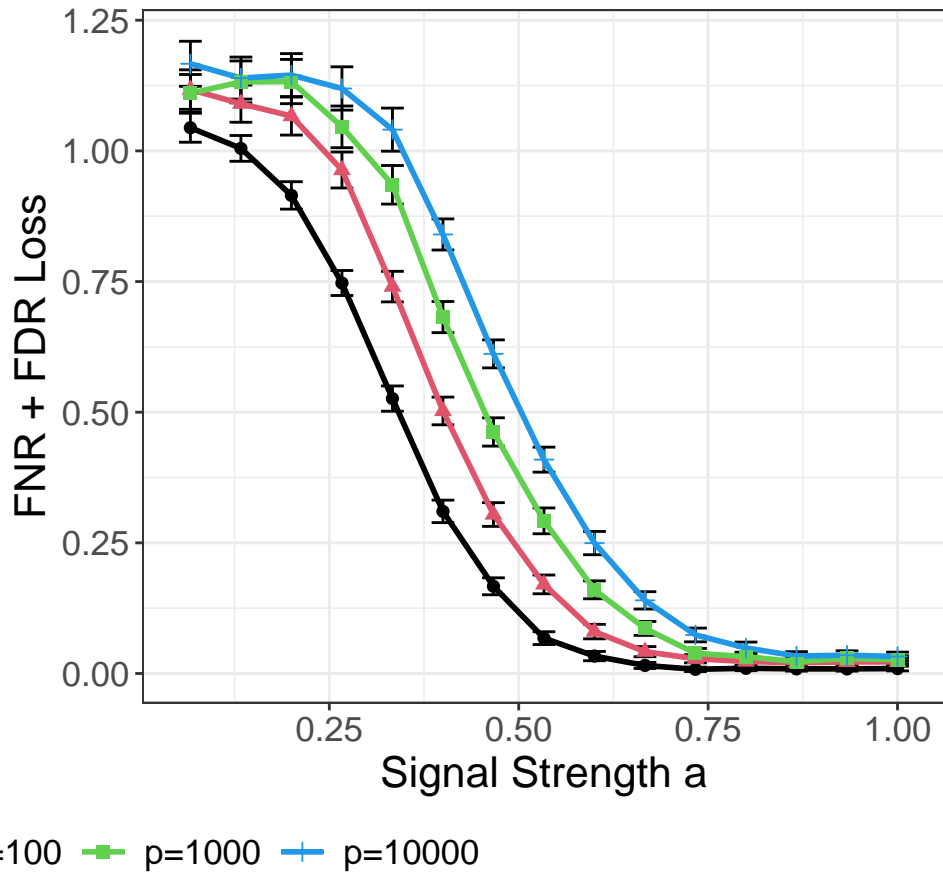

Supplement: supplementary_material [file p1.pdf › Supplementary Material/p1.pdf]

Support Recovery

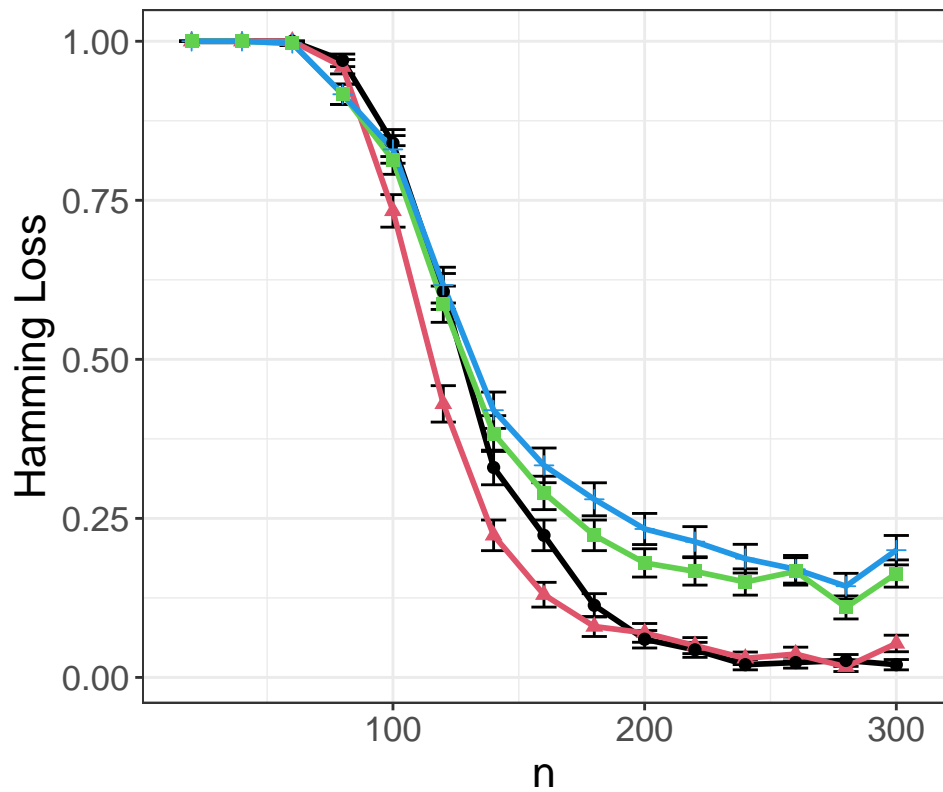

Sparse Multiple Testing

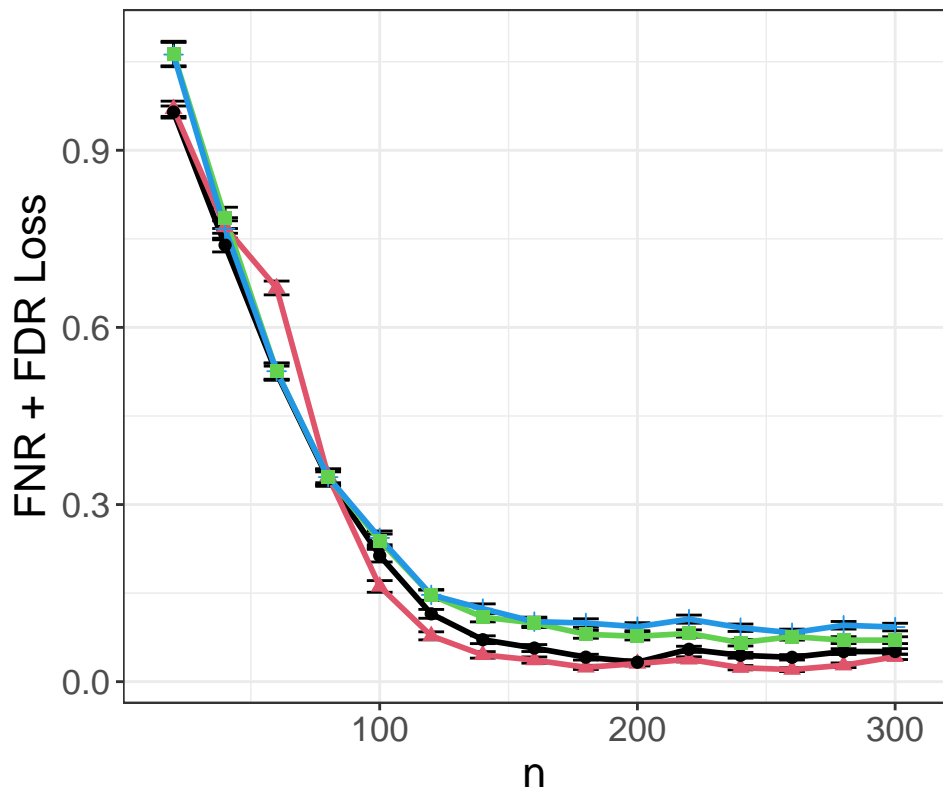

Method   ● Adaptation   ▲ Optimal   ■ Suboptimal   + Univariate

Supplement: supplementary_material [file p2.pdf › Supplementary Material/p2.pdf]

Support Recovery

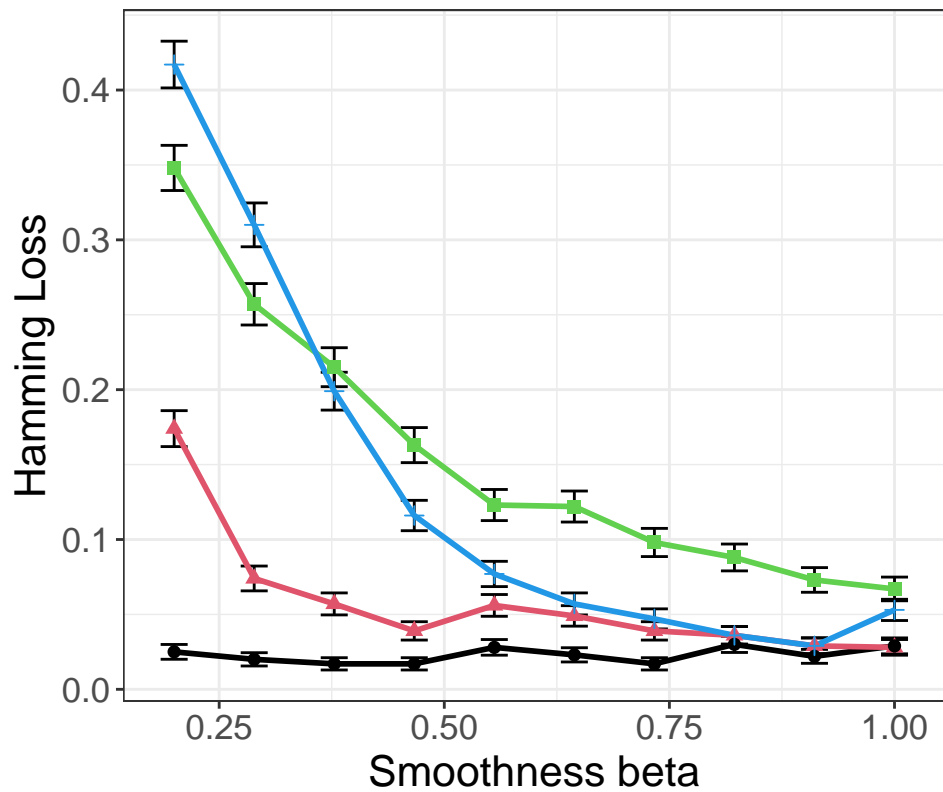

Sparse Multiple Testing

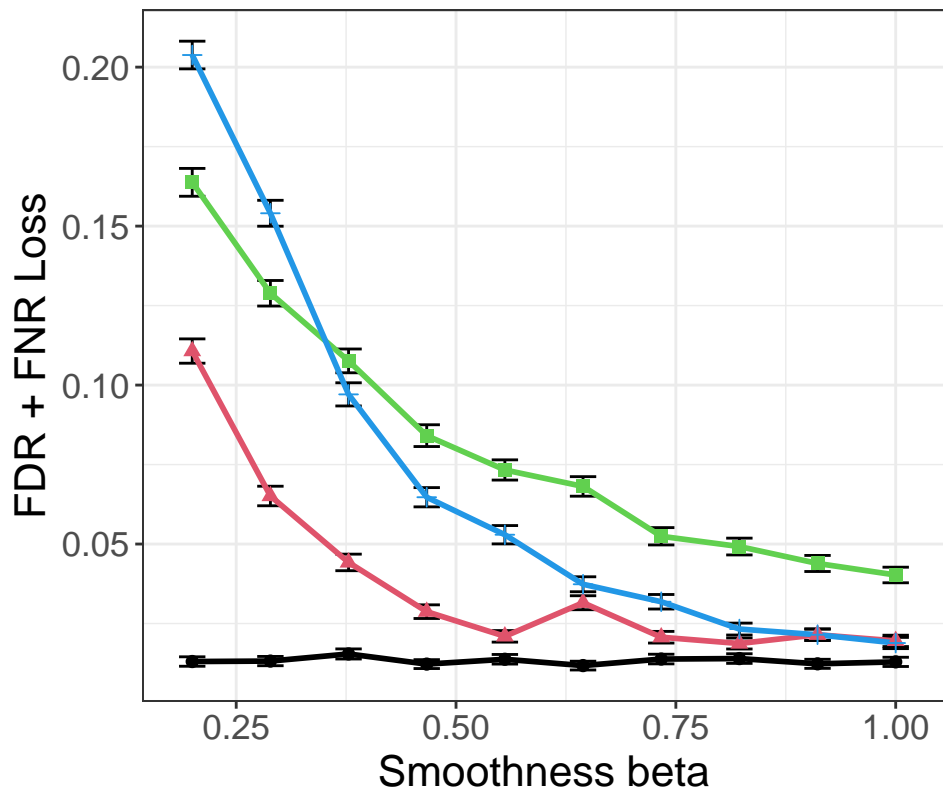

Method   ● Adaptation   ▲ Optimal   ■ Suboptimal   + Univariate

Supplement: supplementary_material [file p3 with 1000 MC.pdf › Supplementary Material/p3 with 1000 MC.pdf]

Support Recovery

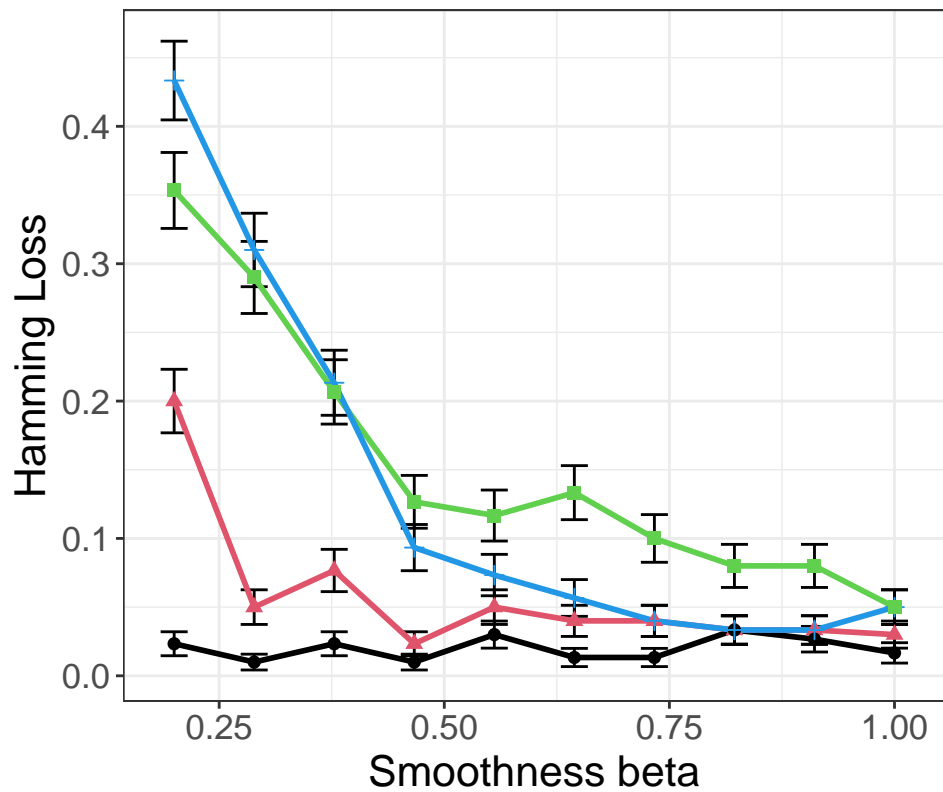

Sparse Multiple Testing

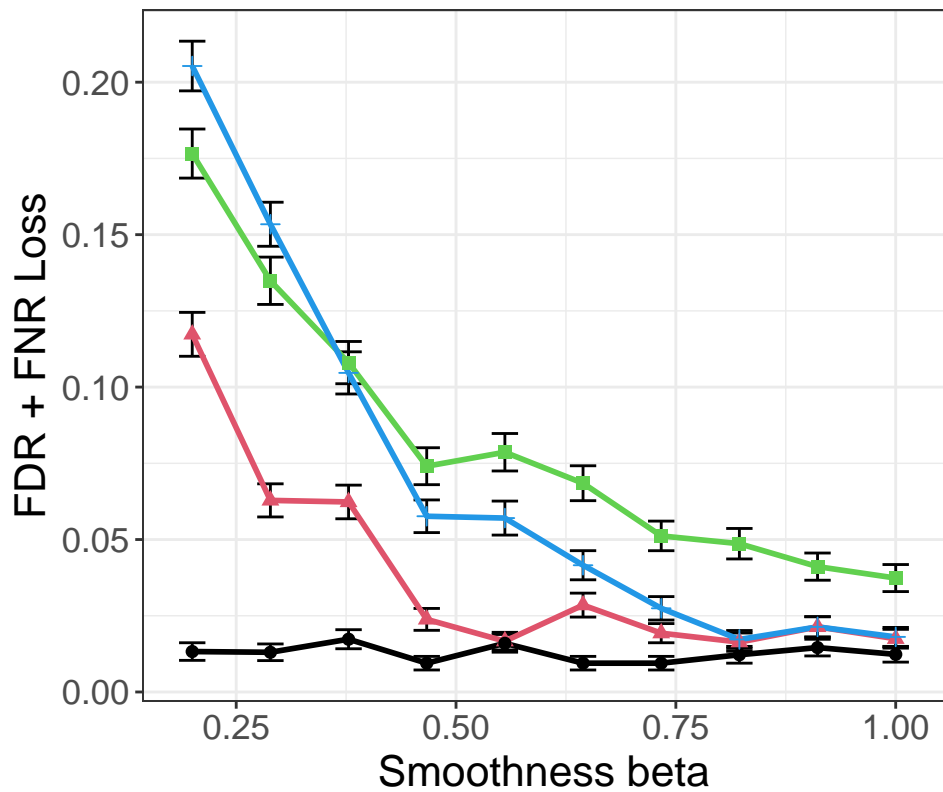

Method   ● Adaptation   ▲ Optimal   ■ Suboptimal   + Univariate

Supplement: supplementary_material [file p3.pdf › Supplementary Material/p3.pdf]
